# Supplementary material
Source: PubMed Central journal article supplement (PMC4088991)
Supplement: NIHMS573432-supplement-01.pdf [file NIHMS573432-supplement-01.pdf]

## Supporting Information

### *Explosive thermal reduction of graphene oxide: mechanism and safety implications*

Fig.S1: Synthesis of 15-cycle drop-cast GO film. S1a) synthesis procedure, S1b) photo image of all GO films synthesized on polystyrene substrate, S1c) photo images of 3-cycle, 9-cycle and 12-cycle drop-cast GO films. Note as thickness increases, the GO film gets less transparent.

Fig.S2: Images of DSC cell and TGA sample pan before and after micro-explosions.

S2a) DSC cell image before explosion, S2b) DSC cell image after explosion. Initially approximately 2 mg of GO cake was placed into aluminum hermetic sample pan. Note, after micro-explosion the sample pan is torn into two parts - the lid and the bottom parts, and reference pan in DSC cell is misplaced. Black colored fine GO cake powder covers most of the cell. Fig. S2c) and S2d): TGA sample pan images before and after explosion with 3.6 mg GO cake.

Fig.S3: 15-cycle drop-cast GO film and 15-cycle drop-cast rGO film FTIR results. GO film has wide hydroxyl peak range ( $2900-3600\text{ cm}^{-1}$ ), together with epoxides ( $962\text{ cm}^{-1}$ ), ethers ( $1035\text{ cm}^{-1}$ ) and carboxyls ( $1724\text{ cm}^{-1}$ ). The  $1619\text{ cm}^{-1}$  peak is related to vibrations of the unmodified graphenic domains within GO. During thermal exfoliation in inert  $\text{N}_2$  most of the oxides are removed when heated to  $250^\circ\text{C}$ .

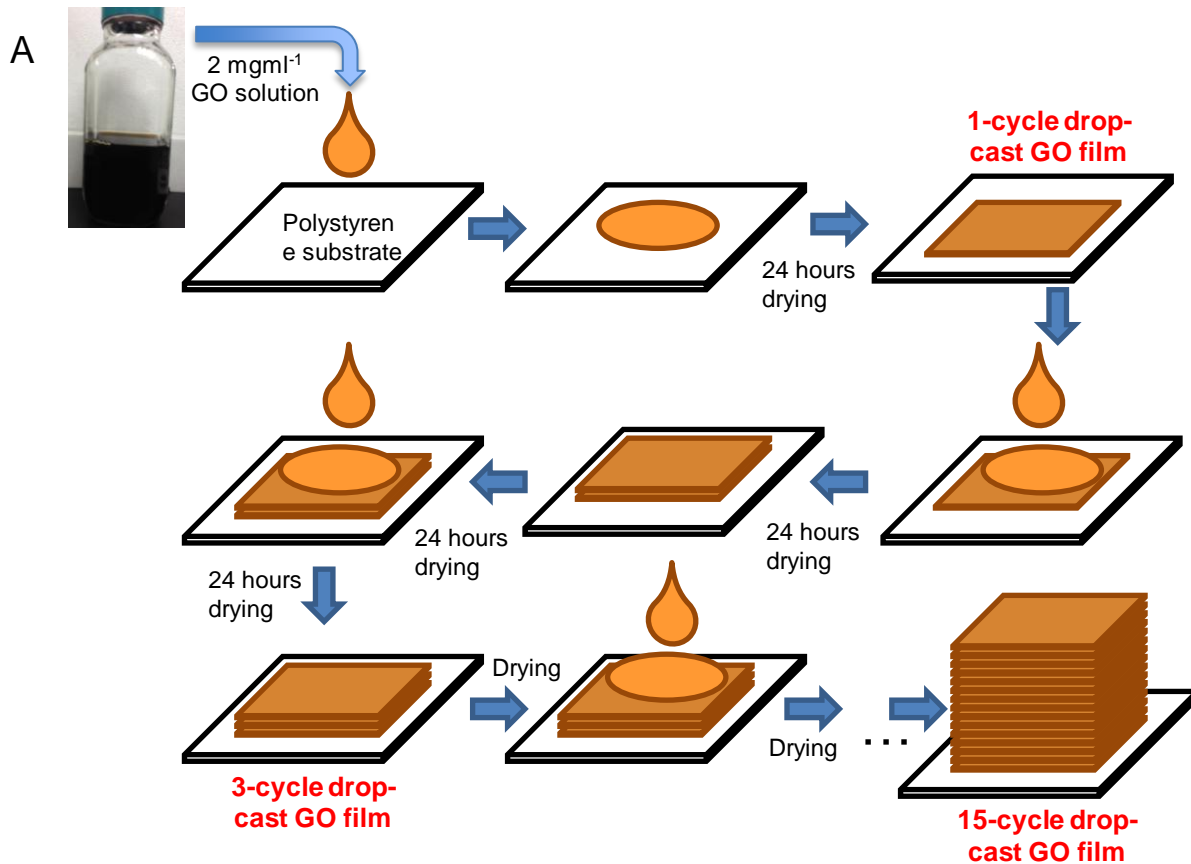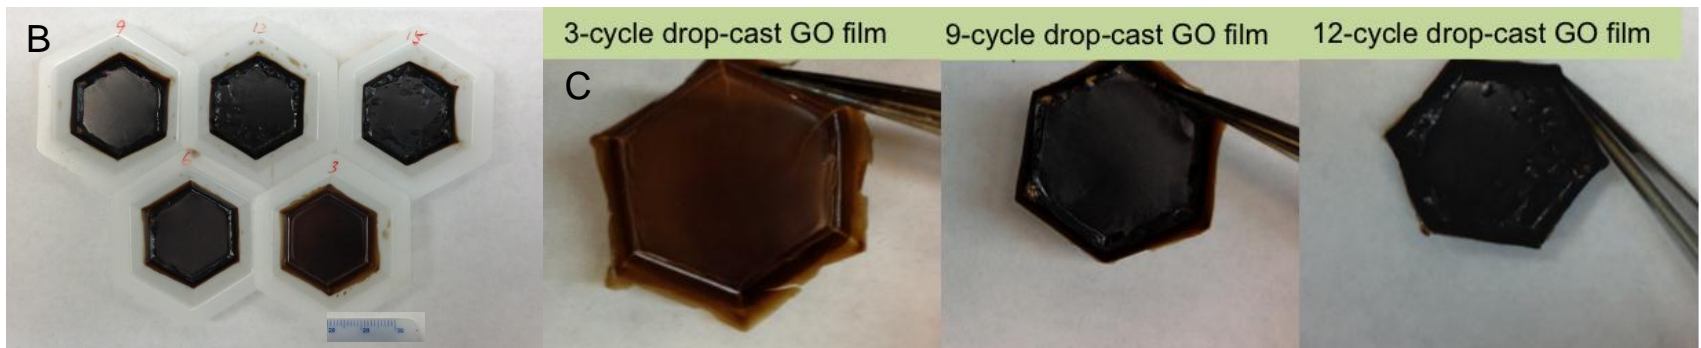

Fig. S1: Synthesis of 15-cycle drop-cast GO film. S1a) synthesis procedure, S1b) photo image of all GO films synthesized on polystyrene substrate, S1c) photo images of 3-cycle, 9-cycle and 12-cycle drop-cast GO films. Notice as thickness increases the GO films get less transparent.

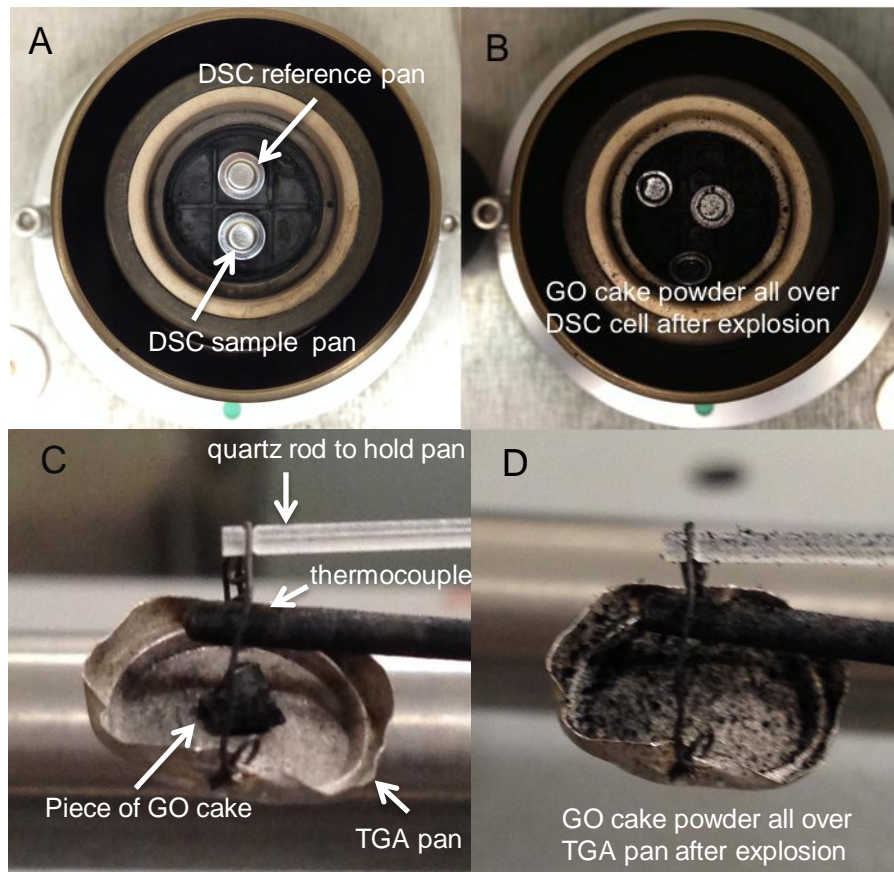

Fig. S2: Images of DSC cell and TGA with sample before and after micro-explosions. S2a) and S2b) DSC cell images before and after explosion. Aluminum hermetic sample pan had ~2 mg of GO cake sample. Note, after micro-explosion the sample pan is torn into two parts the lid and bottom part, and reference pan are misplaced. GO cake powder all over the cell. Fig. S2c) and S2d): TGA sample pan images before and after explosion with 3.6 mg GO cake mass.

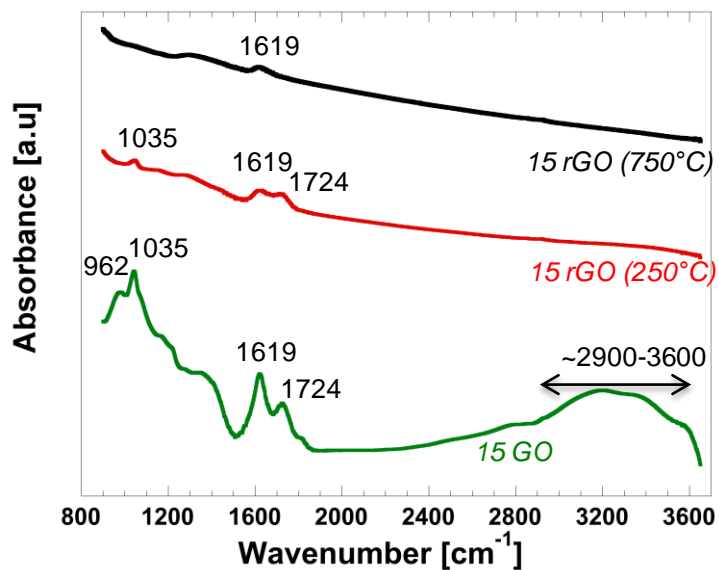

Fig. S3: 15-cycle drop-cast GO and rGO film FTIR results. GO film has wide hydroxyl peak range (2900-3600  $\text{cm}^{-1}$ ), together with epoxides (962  $\text{cm}^{-1}$ ), ethers (1035  $\text{cm}^{-1}$ ) and carboxyls (1724  $\text{cm}^{-1}$ ). The 1619  $\text{cm}^{-1}$  peak is related to vibrations of the unmodified graphenic domain within GO. During thermal exfoliation in inert  $\text{N}_2$  most of the oxides are removed when heated to 250°C.
